# Supplementary material for: Persistently elevated osteopontin serum levels predict mortality in critically ill patients
Source: Springer Nature journal article supplement (doi:10.1186/s13054-015-0988-4), 2015-06-22
Supplement: MOESM1 [file 9780614]

Suppl. Table 1: Cutoff values for OPN at day 3 to distinguish between ICU- survivors yes vs. no

| <b>Cutoff value [ng/ml]</b> | <b>sensitivity</b> | <b>specificity</b> | <b>Youden index</b> | <b>LHR+</b> | <b>LHR-</b> | <b>diagnostic odds ratio</b> |
|-----------------------------|--------------------|--------------------|---------------------|-------------|-------------|------------------------------|
| 2148                        | 0.73               | 0.69               | 0.42                | 2.33        | 0.39        | 5.93                         |
| 2786                        | 0.38               | 0.85               | 0.23                | 2.54        | 0.72        | 3.51                         |
| 1653                        | 0.85               | 0.36               | 0.21                | 1.32        | 0.43        | 3.10                         |

Suppl. Table 2: Cutoff values for OPN at day 3 to distinguish between overall- survivors yes vs. no

| <b>Cutoff value [ng/ml]</b> | <b>sensitivity</b> | <b>specificity</b> | <b>Youden index</b> | <b>LHR+</b> | <b>LHR-</b> | <b>diagnostic odds ratio</b> |
|-----------------------------|--------------------|--------------------|---------------------|-------------|-------------|------------------------------|
| 2208                        | 0.51               | 0.72               | 0.23                | 1.82        | 0.68        | 2.67                         |
| 2808                        | 0.29               | 0.86               | 0.15                | 2.04        | 0.83        | 2.45                         |
| 1486                        | 0.86               | 0.21               | 0.07                | 1.09        | 0.68        | 1.60                         |
